# Supplementary material
Source: PubMed Central journal article supplement (PMC8059250)
Supplement: NIHMS1690808-supplement-Fig-S1-S2.pdf [file NIHMS1690808-supplement-Fig-S1-S2.pdf]

**The factor XIII Val34Leu polymorphism decreases whole blood clot mass at high fibrinogen concentrations**  
Sravya Kattula, Zsuzsa Bagoly, Noémi Klára Tóth, László Muszbek, and Alisa S. Wolberg

**SUPPLEMENTAL FIGURES**

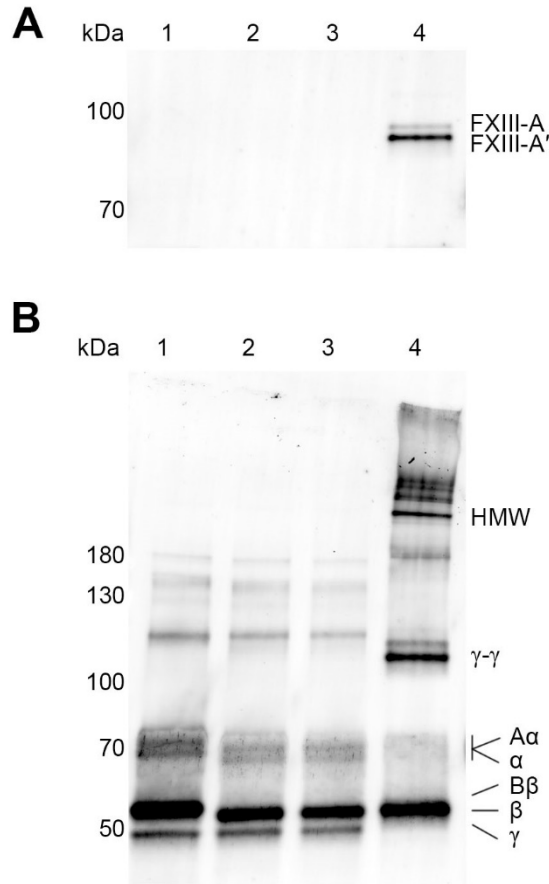

**Supplemental figure 1. FXIII is not present in peak 1 fibrinogen preparation.** Fibrinogen peak 1 was analyzed to identify potential contaminating FXIII antigen and activity by western blot detection of (A) FXIII-A subunit and (B) fibrin crosslinking, respectively. Lanes are: (1) peak 1 fibrinogen (unclotted negative control), (2) peak 1 fibrinogen + thrombin + EDTA (uncrosslinked negative control), (3) peak 1 fibrinogen + thrombin + calcium, and (4) unfractionated fibrinogen + thrombin + calcium (crosslinked positive control). HMW, high molecular weight fibrin species.

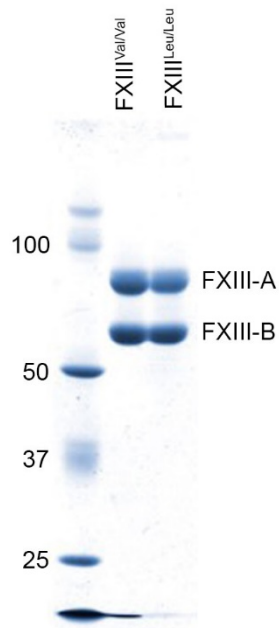

**Supplemental figure 2. Purified FXIII<sup>Val/Val</sup> and FXIII<sup>Leu/Leu</sup> zymogens.** FXIII<sup>Val/Val</sup> and FXIII<sup>Leu/Leu</sup> zymogens (10 µg) were purified from human plasma, subjected to non-reducing SDS-PAGE (7.5% gel) to separate the FXIII-A and -B subunits, and stained with Coomassie Brilliant Blue.
